# Supplementary material for: Understanding the role of manganese valence in 4 V spinel cathodes for lithium-ion batteries: a systematic investigation
Source: Royal Society of Chemistry journal article supplement (doi:10.1039/c3ra45689g), 2013-11-27
Supplement: c3ra45689g.pdf [file c3ra45689g.pdf]

### Supporting information

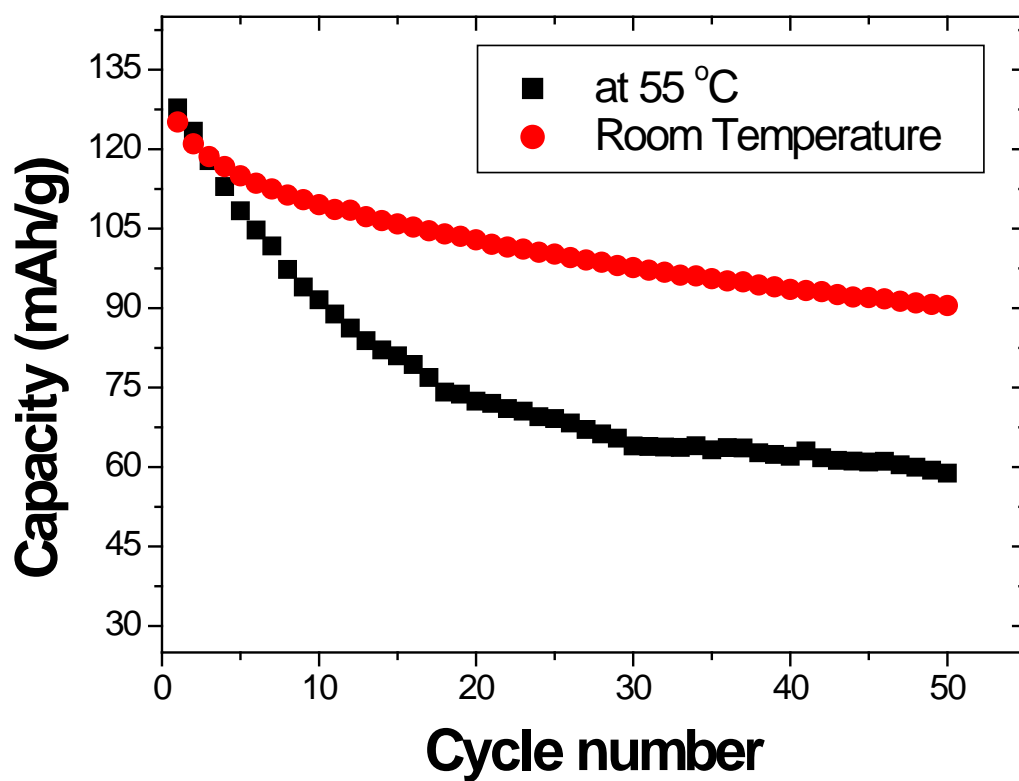

S1: Cycling performance of pristine LiMn<sub>2</sub>O<sub>4</sub> at both room temperature and 55 °C.
